# Supplementary material for: Comparison of a low transition temperature mixture (LTTM) formed by lactic acid and choline chloride with choline lactate ionic liquid and the choline chloride salt: physical properties and vapour–liquid equilibria of mixtures containing water and ethanol
Source: Royal Society of Chemistry journal article supplement (doi:10.1039/c3ra40303c), 2013-01-01
Supplement: c3ra40303c.pdf [file c3ra40303c.pdf]

**Table SI.1** Density ( $\rho$ ) experimental values for binary mixtures of (i) choline lactate + water, (ii) LC(2:1) + water and (iii) choline chloride + water as a function of temperature ( $T$ ) and composition ( $X$ ). The choline chloride concentration is kept below the saturation point of the mixture (0.650 g/cm<sup>3</sup>).

| Choline Lactate (1) + water (2)  |                             |        |        |        |        |                     |        |        |        |        |                     |
|----------------------------------|-----------------------------|--------|--------|--------|--------|---------------------|--------|--------|--------|--------|---------------------|
| $X_1$                            | 1.0000                      | 0.9008 | 0.7952 | 0.6992 | 0.5962 | 0.4974              | 0.4142 | 0.299  | 0.2007 | 0.1002 | 0.0000 <sup>a</sup> |
| $T$ (K)                          | $\rho$ (g/cm <sup>3</sup> ) |        |        |        |        |                     |        |        |        |        |                     |
| 293.15                           | 1.1456                      | 1.1457 | 1.1449 | 1.1441 | 1.1429 | 1.1409              | 1.1388 | 1.1331 | 1.1218 | 1.0930 | 0.9982              |
| 298.15                           | 1.1423                      | 1.1422 | 1.1415 | 1.1407 | 1.1395 | 1.1375              | 1.1355 | 1.1297 | 1.1184 | 1.0899 | 0.9971              |
| 303.15                           | 1.1390                      | 1.1390 | 1.1382 | 1.1375 | 1.1363 | 1.1343              | 1.1322 | 1.1264 | 1.1152 | 1.0869 | 0.9957              |
| 308.15                           | 1.1358                      | 1.1357 | 1.1350 | 1.1343 | 1.1331 | 1.1311              | 1.1290 | 1.1231 | 1.1119 | 1.0839 | 0.9940              |
| 313.15                           | 1.1327                      | 1.1326 | 1.1319 | 1.1312 | 1.1300 | 1.1279              | 1.1258 | 1.1198 | 1.1087 | 1.0810 | 0.9922              |
| 318.15                           | 1.1296                      | 1.1295 | 1.1288 | 1.1281 | 1.1268 | 1.1247              | 1.1225 | 1.1165 | 1.1055 | 1.0779 | 0.9902              |
| 323.15                           | 1.1265                      | 1.1264 | 1.1257 | 1.1249 | 1.1237 | 1.1215              | 1.1193 | 1.1133 | 1.1022 | 1.0749 | 0.9880              |
| 328.15                           | 1.1235                      | 1.1233 | 1.1226 | 1.1218 | 1.1205 | 1.1184              | 1.1161 | 1.1100 | 1.0990 | 1.0717 | 0.9857              |
| 333.15                           | 1.1205                      | 1.1202 | 1.1195 | 1.1187 | 1.1174 | 1.1152              | 1.1129 | 1.1067 | 1.0956 | 1.0687 | 0.9832              |
| 338.15                           | 1.1175                      | 1.1172 | 1.1164 | 1.1156 | 1.1142 | 1.1120              | 1.1096 | 1.1035 | 1.0925 | 1.0654 | 0.9806              |
| 343.15                           | 1.1145                      | 1.1141 | 1.1133 | 1.1125 | 1.1111 | 1.1089              | 1.1064 | 1.1002 | 1.0891 | 1.0622 | 0.9778              |
| 348.15                           | 1.1115                      | 1.1111 | 1.1103 | 1.1095 | 1.1080 | 1.1057              | 1.1033 | 1.0969 | 1.0857 | 1.0589 | 0.9748              |
| 353.15                           | 1.1085                      | 1.1081 | 1.1073 | 1.1064 | 1.1049 | 1.1026              | 1.1001 | 1.0937 | 1.0824 | 1.0556 | 0.9718              |
| LC(2:1) (1) + water (2)          |                             |        |        |        |        |                     |        |        |        |        |                     |
| $X_1$                            | 1.0000                      | 0.8796 | 0.7983 | 0.6990 | 0.6012 | 0.4934              | 0.3977 | 0.2944 | 0.2005 | 0.1003 | 0.0000 <sup>a</sup> |
| $T$ (K)                          | $\rho$ (g/cm <sup>3</sup> ) |        |        |        |        |                     |        |        |        |        |                     |
| 293.15                           | 1.1829                      | 1.1788 | 1.1757 | 1.1717 | 1.1672 | 1.1603              | 1.1509 | 1.1355 | 1.1139 | 1.0749 | 0.9982              |
| 298.15                           | 1.1794                      | 1.1754 | 1.1723 | 1.1684 | 1.1639 | 1.1570              | 1.1475 | 1.1321 | 1.1106 | 1.0720 | 0.9971              |
| 303.15                           | 1.1761                      | 1.1721 | 1.1691 | 1.1652 | 1.1606 | 1.1537              | 1.1443 | 1.1289 | 1.1075 | 1.0693 | 0.9957              |
| 308.15                           | 1.1728                      | 1.1689 | 1.1659 | 1.162  | 1.1574 | 1.1505              | 1.1411 | 1.1257 | 1.1044 | 1.0666 | 0.9940              |
| 313.15                           | 1.1696                      | 1.1657 | 1.1627 | 1.1588 | 1.1541 | 1.1472              | 1.1378 | 1.1225 | 1.1013 | 1.0638 | 0.9922              |
| 318.15                           | 1.1664                      | 1.1625 | 1.1595 | 1.1556 | 1.1508 | 1.1439              | 1.1345 | 1.1192 | 1.0981 | 1.0609 | 0.9902              |
| 323.15                           | 1.1633                      | 1.1593 | 1.1562 | 1.1523 | 1.1475 | 1.1407              | 1.1312 | 1.1159 | 1.0949 | 1.0580 | 0.9880              |
| 328.15                           | 1.1602                      | 1.1561 | 1.1530 | 1.1491 | 1.1443 | 1.1373              | 1.1279 | 1.1126 | 1.0916 | 1.0550 | 0.9857              |
| 333.15                           | 1.1570                      | 1.1529 | 1.1498 | 1.1459 | 1.1410 | 1.1340              | 1.1246 | 1.1093 | 1.0884 | 1.0520 | 0.9832              |
| 338.15                           | 1.1539                      | 1.1496 | 1.1465 | 1.1426 | 1.1377 | 1.1307              | 1.1213 | 1.1059 | 1.0850 | 1.0488 | 0.9806              |
| 343.15                           | 1.1507                      | 1.1464 | 1.1433 | 1.1394 | 1.1344 | 1.1274              | 1.1179 | 1.1026 | 1.0818 | 1.0457 | 0.9778              |
| 348.15                           | 1.1476                      | 1.1432 | 1.1401 | 1.1361 | 1.1310 | 1.1240              | 1.1144 | 1.0992 | 1.0783 | 1.0426 | 0.9748              |
| 353.15                           | 1.1444                      | 1.1400 | 1.1368 | 1.1329 | 1.1277 | 1.1206              | 1.1110 | 1.0957 | 1.0749 | 1.0391 | 0.9718              |
| Choline Chloride (1) + water (2) |                             |        |        |        |        |                     |        |        |        |        |                     |
| $X_1$                            | 0.3033                      | 0.2500 | 0.2015 | 0.1500 | 0.0991 | 0.0000 <sup>a</sup> |        |        |        |        |                     |
| $T$ (K)                          | $\rho$ (g/cm <sup>3</sup> ) |        |        |        |        |                     |        |        |        |        |                     |
| 293.15                           | 1.1008                      | 1.0930 | 1.0849 | 1.0722 | 1.0554 | 0.9982              |        |        |        |        |                     |
| 298.15                           | 1.0985                      | 1.0906 | 1.0826 | 1.0699 | 1.0532 | 0.9971              |        |        |        |        |                     |
| 303.15                           | 1.0961                      | 1.0883 | 1.0803 | 1.0676 | 1.0511 | 0.9957              |        |        |        |        |                     |
| 308.15                           | 1.0938                      | 1.0860 | 1.0779 | 1.0653 | 1.0490 | 0.9940              |        |        |        |        |                     |
| 313.15                           | 1.0914                      | 1.0837 | 1.0756 | 1.0631 | 1.0468 | 0.9922              |        |        |        |        |                     |
| 318.15                           | 1.0891                      | 1.0813 | 1.0732 | 1.0607 | 1.0845 | 0.9902              |        |        |        |        |                     |
| 323.15                           | 1.0868                      | 1.0789 | 1.0709 | 1.0548 | 1.0422 | 0.9880              |        |        |        |        |                     |
| 328.15                           | 1.0844                      | 1.0766 | 1.0685 | 1.0560 | 1.0398 | 0.9857              |        |        |        |        |                     |
| 333.15                           | 1.0821                      | 1.0742 | 1.0661 | 1.0537 | 1.0374 | 0.9832              |        |        |        |        |                     |
| 338.15                           | 1.0797                      | 1.0718 | 1.0637 | 1.0513 | 1.0349 | 0.9806              |        |        |        |        |                     |
| 343.15                           | 1.0772                      | 1.0693 | 1.0612 | 1.0487 | 1.0325 | 0.9778              |        |        |        |        |                     |
| 348.15                           | 1.0749                      | 1.0669 | 1.0588 | 1.0462 | 1.0298 | 0.9748              |        |        |        |        |                     |
| 353.15                           | 1.0725                      | 1.0645 | 1.0563 | 1.0437 | 1.027  | 0.9718              |        |        |        |        |                     |

<sup>a</sup>Data from NIST

**Table SI. 2** Fit parameters of the first-order polynomial ( $\rho = a + bT$ ) for the fitting of the density ( $\text{g/cm}^3$ ) in dependence of the temperature (K) at different concentrations ( $X$ ) including standard deviation ( $\sigma$ ) for the binary systems (i) choline lactate + water, (ii) LC(2:1) + water and (iii) choline chloride + water.

| Choline lactate (1) + water (2) |                         |                         |          | LC(2:1) (1) + water (2) |                         |                         |          | Choline Chloride (1) + water (2) |                         |                         |          |
|---------------------------------|-------------------------|-------------------------|----------|-------------------------|-------------------------|-------------------------|----------|----------------------------------|-------------------------|-------------------------|----------|
| $X_1$                           | $a$ ( $\text{g/cm}^3$ ) | $b$ ( $\text{K}^{-1}$ ) | $\sigma$ | $X_1$                   | $a$ ( $\text{g/cm}^3$ ) | $b$ ( $\text{K}^{-1}$ ) | $\sigma$ | $X_1$                            | $a$ ( $\text{g/cm}^3$ ) | $b$ ( $\text{K}^{-1}$ ) | $\sigma$ |
| 1                               | 1.3241                  | -0.0006                 | 0.0038   | 1                       | 1.3686                  | -0.0006                 | 0.0113   | 0.3                              | 1.2395                  | -0.0005                 | 0.0096   |
| 0.9                             | 1.3267                  | -0.0006                 | 0.0068   | 0.9                     | 1.3674                  | -0.0006                 | 0.0142   | 0.25                             | 1.2330                  | -0.0005                 | 0.0081   |
| 0.8                             | 1.3264                  | -0.0006                 | 0.0073   | 0.8                     | 1.3651                  | -0.0006                 | 0.0150   | 0.20                             | 1.2254                  | -0.0005                 | 0.0076   |
| 0.7                             | 1.3263                  | -0.0006                 | 0.0080   | 0.7                     | 1.3611                  | -0.0006                 | 0.0149   | 0.15                             | 1.2128                  | -0.0005                 | 0.0076   |
| 0.6                             | 1.3270                  | -0.0006                 | 0.0102   | 0.6                     | 1.3599                  | -0.0007                 | 0.0138   | 0.1                              | 1.1965                  | -0.0005                 | 0.0075   |
| 0.5                             | 1.3268                  | -0.0006                 | 0.0124   | 0.5                     | 1.3539                  | -0.0007                 | 0.0129   | 0                                | 1.1400                  | -0.0005                 | 0.0090   |
| 0.4                             | 1.3272                  | -0.0006                 | 0.0152   | 0.4                     | 1.3452                  | -0.0007                 | 0.0121   |                                  |                         |                         |          |
| 0.3                             | 1.3249                  | -0.0007                 | 0.0160   | 0.3                     | 1.3292                  | -0.0007                 | 0.0128   |                                  |                         |                         |          |
| 0.2                             | 1.3140                  | -0.0007                 | 0.0157   | 0.2                     | 1.3038                  | -0.0006                 | 0.0153   |                                  |                         |                         |          |
| 0.1                             | 1.2773                  | -0.0006                 | 0.0097   | 0.1                     | 1.2490                  | -0.0006                 | 0.0025   |                                  |                         |                         |          |
| 0                               | 1.1400                  | -0.0005                 | 0.0090   | 0                       | 1.1400                  | -0.0005                 | 0.0090   |                                  |                         |                         |          |

Here, the root-mean square deviation is calculated as follows:

$$\sigma = \sqrt{\frac{\sum_{i=1}^n (\rho_{exp} - \rho_{calc})^2}{(n - 2)}}$$

where  $\rho_{exp}$  and  $\rho_{calc}$  are the experimental and calculated values (from eq. 1) found for density.

**Table SI.3** Experimental values of excess molar volume ( $V_m^E$ ) of the binary mixtures composed of (i) choline lactate + water, (ii) LC (2:1) + water and (iii) choline chloride + water as a function of temperature ( $T$ ) and composition ( $X$ ).

| Choline Lactate (1) + water (2)  |                                               |         |         |         |         |         |         |         |         |         |        |
|----------------------------------|-----------------------------------------------|---------|---------|---------|---------|---------|---------|---------|---------|---------|--------|
| $X_1$                            | 1.0000                                        | 0.9008  | 0.7952  | 0.6992  | 0.5962  | 0.4974  | 0.4142  | 0.2990  | 0.2007  | 0.1002  | 0.0000 |
| $T$ (K)                          | $V_m^E$ (cm <sup>3</sup> ·mol <sup>-1</sup> ) |         |         |         |         |         |         |         |         |         |        |
| 293.15                           | 0.0000                                        | -0.4871 | -0.3913 | -0.5372 | -0.6845 | -0.7883 | -0.8874 | -0.9491 | -0.8706 | -0.5948 | 0.0000 |
| 298.15                           | 0.0000                                        | -0.4581 | -0.3737 | -0.5182 | -0.6638 | -0.7657 | -0.8704 | -0.9225 | -0.8411 | -0.5699 | 0.0000 |
| 303.15                           | 0.0000                                        | -0.4660 | -0.3690 | -0.5219 | -0.6636 | -0.7614 | -0.8557 | -0.9043 | -0.8233 | -0.5518 | 0.0000 |
| 308.15                           | 0.0000                                        | -0.4507 | -0.3654 | -0.5165 | -0.6560 | -0.7517 | -0.8442 | -0.8843 | -0.8013 | -0.5357 | 0.0000 |
| 313.15                           | 0.0000                                        | -0.4485 | -0.3627 | -0.5125 | -0.6505 | -0.7361 | -0.8284 | -0.8620 | -0.7831 | -0.5241 | 0.0000 |
| 318.15                           | 0.0000                                        | -0.4471 | -0.3608 | -0.5095 | -0.6367 | -0.7222 | -0.8074 | -0.8420 | -0.7677 | -0.5095 | 0.0000 |
| 323.15                           | 0.0000                                        | -0.4462 | -0.3594 | -0.4963 | -0.6336 | -0.7097 | -0.7950 | -0.8295 | -0.7501 | -0.5005 | 0.0000 |
| 328.15                           | 0.0000                                        | -0.4338 | -0.3466 | -0.4845 | -0.6130 | -0.6994 | -0.7782 | -0.8089 | -0.7363 | -0.4868 | 0.0000 |
| 333.15                           | 0.0000                                        | -0.4219 | -0.3341 | -0.4732 | -0.6030 | -0.6819 | -0.7627 | -0.7899 | -0.7156 | -0.4814 | 0.0000 |
| 338.15                           | 0.0000                                        | -0.4230 | -0.3222 | -0.4628 | -0.5842 | -0.6658 | -0.7414 | -0.7786 | -0.7104 | -0.4692 | 0.0000 |
| 343.15                           | 0.0000                                        | -0.4119 | -0.3106 | -0.4530 | -0.5762 | -0.6592 | -0.7288 | -0.7632 | -0.6937 | -0.4625 | 0.0000 |
| 348.15                           | 0.0000                                        | -0.4140 | -0.3121 | -0.4553 | -0.5690 | -0.6453 | -0.7249 | -0.7493 | -0.6789 | -0.4547 | 0.0000 |
| 353.15                           | 0.0000                                        | -0.4167 | -0.3142 | -0.4468 | -0.5628 | -0.6410 | -0.7149 | -0.7428 | -0.6703 | -0.4490 | 0.0000 |
| LC(2:1) (1) + water (2)          |                                               |         |         |         |         |         |         |         |         |         |        |
| $X_1$                            | 1.0000                                        | 0.8796  | 0.7983  | 0.6990  | 0.6012  | 0.4934  | 0.3977  | 0.2944  | 0.2005  | 0.1003  | 0.0000 |
| $T$ (K)                          | $V_m^E$ (cm <sup>3</sup> ·mol <sup>-1</sup> ) |         |         |         |         |         |         |         |         |         |        |
| 293.15                           | 0.0000                                        | -0.0567 | -0.1082 | -0.2016 | -0.3122 | -0.4100 | -0.4440 | -0.4310 | -0.3778 | -0.2491 | 0.0000 |
| 298.15                           | 0.0000                                        | -0.0590 | -0.1071 | -0.2022 | -0.3082 | -0.4008 | -0.4260 | -0.4079 | -0.3528 | -0.2272 | 0.0000 |
| 303.15                           | 0.0000                                        | -0.0554 | -0.1075 | -0.1992 | -0.2967 | -0.3862 | -0.4124 | -0.3901 | -0.3338 | -0.2121 | 0.0000 |
| 308.15                           | 0.0000                                        | -0.0592 | -0.1087 | -0.1974 | -0.2920 | -0.3782 | -0.4011 | -0.3750 | -0.3178 | -0.2005 | 0.0000 |
| 313.15                           | 0.0000                                        | -0.0566 | -0.1044 | -0.1912 | -0.2786 | -0.3634 | -0.3846 | -0.3598 | -0.3029 | -0.1889 | 0.0000 |
| 318.15                           | 0.0000                                        | -0.0544 | -0.1009 | -0.1861 | -0.2666 | -0.3502 | -0.3701 | -0.3436 | -0.2879 | -0.1780 | 0.0000 |
| 323.15                           | 0.0000                                        | -0.0457 | -0.0849 | -0.1703 | -0.2508 | -0.3392 | -0.3541 | -0.3270 | -0.2734 | -0.1689 | 0.0000 |
| 328.15                           | 0.0000                                        | -0.0372 | -0.0762 | -0.1613 | -0.2417 | -0.3203 | -0.3400 | -0.3126 | -0.2585 | -0.1602 | 0.0000 |
| 333.15                           | 0.0000                                        | -0.0360 | -0.0742 | -0.1586 | -0.2328 | -0.3112 | -0.3304 | -0.3022 | -0.2501 | -0.1546 | 0.0000 |
| 338.15                           | 0.0000                                        | -0.0208 | -0.0596 | -0.1451 | -0.2201 | -0.2996 | -0.3193 | -0.2878 | -0.2363 | -0.1460 | 0.0000 |
| 343.15                           | 0.0000                                        | -0.0202 | -0.0587 | -0.1439 | -0.2132 | -0.2931 | -0.3086 | -0.2811 | -0.2322 | -0.1429 | 0.0000 |
| 348.15                           | 0.0000                                        | -0.0127 | -0.0517 | -0.1317 | -0.1968 | -0.2789 | -0.2918 | -0.2700 | -0.2191 | -0.1412 | 0.0000 |
| 353.15                           | 0.0000                                        | -0.0126 | -0.0449 | -0.1320 | -0.1917 | -0.2698 | -0.2838 | -0.2592 | -0.2126 | -0.1325 | 0.0000 |
| Choline Chloride (1) + water (2) |                                               |         |         |         |         |         |         |         |         |         |        |
| $X_1$                            | 0.3033                                        | 0.2500  | 0.2015  | 0.1500  | 0.0991  | 0.0000  |         |         |         |         |        |
| $T$ (K)                          | $V_m^E$ (cm <sup>3</sup> ·mol <sup>-1</sup> ) |         |         |         |         |         |         |         |         |         |        |
| 293.15                           | -1.1988                                       | -0.9697 | -0.7945 | -0.5641 | -0.3485 | 0.0000  |         |         |         |         |        |
| 298.15                           | -1.1090                                       | -0.8880 | -0.7280 | -0.5093 | -0.3079 | 0.0000  |         |         |         |         |        |
| 303.15                           | -1.0173                                       | -0.8132 | -0.6646 | -0.4579 | -0.2738 | 0.0000  |         |         |         |         |        |
| 308.15                           | -0.9325                                       | -0.7411 | -0.6006 | -0.4096 | -0.2431 | 0.0000  |         |         |         |         |        |
| 313.15                           | -0.8452                                       | -0.6713 | -0.5426 | -0.3673 | -0.2126 | 0.0000  |         |         |         |         |        |
| 318.15                           | -0.7647                                       | -0.5998 | -0.4836 | -0.3215 | -0.1826 | 0.0000  |         |         |         |         |        |
| 323.15                           | -0.6858                                       | -0.5302 | -0.4304 | -0.2812 | -0.1550 | 0.0000  |         |         |         |         |        |
| 328.15                           | -0.6043                                       | -0.4669 | -0.3759 | -0.2403 | -0.1276 | 0.0000  |         |         |         |         |        |
| 333.15                           | -0.5289                                       | -0.4012 | -0.3233 | -0.2047 | -0.1024 | 0.0000  |         |         |         |         |        |
| 338.15                           | -0.4507                                       | -0.3374 | -0.2728 | -0.1682 | -0.0770 | 0.0000  |         |         |         |         |        |
| 343.15                           | -0.3692                                       | -0.2711 | -0.2205 | -0.1272 | -0.0567 | 0.0000  |         |         |         |         |        |
| 348.15                           | -0.2986                                       | -0.2106 | -0.1737 | -0.0915 | -0.0300 | 0.0000  |         |         |         |         |        |
| 353.15                           | -0.2247                                       | -0.1518 | -0.1250 | -0.0578 | -0.0026 | 0.0000  |         |         |         |         |        |

**Table SI.4** Coefficients of the Redlich-Kister equation for the fitting of the excess molar volume ( $V_m^E$ ) of the binary mixtures composed of (i) choline lactate + water, (ii) LC (2:1) + water and (iii) choline chloride + water.

| Choline Lactate (1) + water (2)  |           |          |           |           |          |           |          |          |          |
|----------------------------------|-----------|----------|-----------|-----------|----------|-----------|----------|----------|----------|
| $T(K)$                           | $b_1$     | $b_2$    | $b_3$     | $b_4$     | $c_1$    | $c_2$     | $c_3$    | $c_4$    | $\sigma$ |
| 293.15                           | -6.007500 | 5.660200 | -5.644200 | -2.101100 | 0.009661 | -0.010987 | 0.011716 | 0.007399 | 0.0082   |
| 298.15                           | -6.007500 | 5.660200 | -5.644200 | -2.101100 | 0.009736 | -0.010989 | 0.012457 | 0.007555 | 0.0065   |
| 303.15                           | -6.007500 | 5.660200 | -5.644200 | -2.101100 | 0.009664 | -0.011108 | 0.012466 | 0.007093 | 0.0086   |
| 308.15                           | -6.007500 | 5.660200 | -5.644200 | -2.101100 | 0.009615 | -0.011282 | 0.012833 | 0.007365 | 0.0069   |
| 313.15                           | -6.007500 | 5.660200 | -5.644200 | -2.101100 | 0.009629 | -0.011475 | 0.012737 | 0.007497 | 0.0079   |
| 318.15                           | -6.007500 | 5.660200 | -5.644200 | -2.101100 | 0.009673 | -0.011569 | 0.012538 | 0.007390 | 0.0074   |
| 323.15                           | -6.007500 | 5.660200 | -5.644200 | -2.101101 | 0.009656 | -0.011496 | 0.012464 | 0.007087 | 0.0079   |
| 328.15                           | -6.007500 | 5.660200 | -5.644200 | -2.101101 | 0.009691 | -0.011405 | 0.012612 | 0.007111 | 0.0055   |
| 333.15                           | -6.007500 | 5.660200 | -5.644199 | -2.101099 | 0.009719 | -0.011508 | 0.012717 | 0.007617 | 0.0060   |
| 338.15                           | -6.007500 | 5.660200 | -5.644200 | -2.101100 | 0.009788 | -0.011241 | 0.012404 | 0.007129 | 0.0070   |
| 343.15                           | -6.007500 | 5.660200 | -5.644200 | -2.101100 | 0.009748 | -0.011274 | 0.012625 | 0.007492 | 0.0058   |
| 348.15                           | -6.007500 | 5.660200 | -5.644200 | -2.101100 | 0.009703 | -0.011307 | 0.012464 | 0.007335 | 0.0071   |
| 353.15                           | -6.007500 | 5.660200 | -5.644200 | -2.101100 | 0.009649 | -0.011155 | 0.012264 | 0.006984 | 0.0052   |
| LC(2:1) (1) + water (2)          |           |          |           |           |          |           |          |          |          |
| $T(K)$                           | $b_1$     | $b_2$    | $b_3$     | $b_4$     | $c_1$    | $c_2$     | $c_3$    | $c_4$    | $\sigma$ |
| 293.15                           | -6.007481 | 5.660187 | -5.644173 | -2.101100 | 0.015125 | -0.014660 | 0.019582 | 0.007525 | 0.0083   |
| 298.15                           | -6.007482 | 5.660187 | -5.644176 | -2.101101 | 0.014998 | -0.014838 | 0.019636 | 0.007258 | 0.0084   |
| 303.15                           | -6.007482 | 5.660188 | -5.644177 | -2.101100 | 0.014913 | -0.014823 | 0.019466 | 0.006990 | 0.0068   |
| 308.15                           | -6.007483 | 5.660188 | -5.644179 | -2.101102 | 0.014779 | -0.014804 | 0.019239 | 0.006679 | 0.0073   |
| 313.15                           | -6.007483 | 5.660190 | -5.644180 | -2.101103 | 0.014726 | -0.014699 | 0.018964 | 0.006439 | 0.0065   |
| 318.15                           | -6.007484 | 5.660190 | -5.644180 | -2.101104 | 0.014658 | -0.014626 | 0.018726 | 0.006257 | 0.0063   |
| 323.15                           | -6.007484 | 5.660191 | -5.644181 | -2.101104 | 0.014612 | -0.014395 | 0.018695 | 0.006133 | 0.0080   |
| 328.15                           | -6.007484 | 5.660191 | -5.644182 | -2.101104 | 0.014557 | -0.014328 | 0.018546 | 0.006238 | 0.0065   |
| 333.15                           | -6.007485 | 5.660192 | -5.644183 | -2.101104 | 0.014448 | -0.014215 | 0.018243 | 0.006141 | 0.0065   |
| 338.15                           | -6.007486 | 5.660192 | -5.644182 | -2.101103 | 0.014368 | -0.014035 | 0.018341 | 0.006234 | 0.0065   |
| 343.15                           | -6.007486 | 5.660192 | -5.644184 | -2.101104 | 0.014248 | -0.013936 | 0.017979 | 0.006251 | 0.0064   |
| 348.15                           | -6.007487 | 5.660193 | -5.644185 | -2.101103 | 0.014227 | -0.013788 | 0.017666 | 0.006293 | 0.0070   |
| 353.15                           | -6.007487 | 5.660193 | -5.644185 | -2.101102 | 0.014104 | -0.013697 | 0.017492 | 0.006215 | 0.0069   |
| Choline Chloride (1) + water (2) |           |          |           |           |          |           |          |          |          |
| $T(K)$                           | $b_1$     | $b_2$    | $b_3$     | $b_4$     | $c_1$    | $c_2$     | $c_3$    | $c_4$    | $\sigma$ |
| 293.15                           | -6.007481 | 5.660187 | -5.644173 | -2.101100 | 0.015125 | -0.014660 | 0.019582 | 0.007525 | 0.0083   |
| 298.15                           | -6.007482 | 5.660187 | -5.644176 | -2.101101 | 0.014998 | -0.014838 | 0.019636 | 0.007258 | 0.0084   |
| 303.15                           | -6.007482 | 5.660188 | -5.644177 | -2.101100 | 0.014913 | -0.014823 | 0.019466 | 0.006990 | 0.0068   |
| 308.15                           | -6.007483 | 5.660188 | -5.644179 | -2.101102 | 0.014779 | -0.014804 | 0.019239 | 0.006679 | 0.0073   |
| 313.15                           | -6.007483 | 5.660190 | -5.644180 | -2.101103 | 0.014726 | -0.014699 | 0.018964 | 0.006439 | 0.0065   |
| 318.15                           | -6.007484 | 5.660190 | -5.644180 | -2.101104 | 0.014658 | -0.014626 | 0.018726 | 0.006257 | 0.0063   |
| 323.15                           | -6.007484 | 5.660191 | -5.644181 | -2.101104 | 0.014612 | -0.014395 | 0.018695 | 0.006133 | 0.0080   |
| 328.15                           | -6.007484 | 5.660191 | -5.644182 | -2.101104 | 0.014557 | -0.014328 | 0.018546 | 0.006238 | 0.0065   |
| 333.15                           | -6.007485 | 5.660192 | -5.644183 | -2.101104 | 0.014448 | -0.014215 | 0.018243 | 0.006141 | 0.0065   |
| 338.15                           | -6.007486 | 5.660192 | -5.644182 | -2.101103 | 0.014368 | -0.014035 | 0.018341 | 0.006234 | 0.0065   |
| 343.15                           | -6.007486 | 5.660192 | -5.644184 | -2.101104 | 0.014248 | -0.013936 | 0.017979 | 0.006251 | 0.0064   |
| 348.15                           | -6.007487 | 5.660193 | -5.644185 | -2.101103 | 0.014227 | -0.013788 | 0.017666 | 0.006293 | 0.0070   |
| 353.15                           | -6.007487 | 5.660193 | -5.644185 | -2.101102 | 0.014104 | -0.013697 | 0.017492 | 0.006215 | 0.0069   |

**Table SI.5** Experimental dynamic viscosity ( $\eta$ ) for binary mixtures of (i) choline lactate + water, (ii) LC(2:1) + water and (iii) choline chloride + water as a function of temperature ( $T$ ) and composition ( $X$ ). The choline chloride concentration is kept below the saturation point of the mixture ( $0.650 \text{ g/cm}^3$ ).

| Choline Lactate (1) + water (2)  |                  |          |          |          |          |                     |          |         |         |        |                     |
|----------------------------------|------------------|----------|----------|----------|----------|---------------------|----------|---------|---------|--------|---------------------|
| $X_1$                            | 1.0000           | 0.9008   | 0.7952   | 0.6992   | 0.5962   | 0.4974              | 0.4142   | 0.299   | 0.2007  | 0.1002 | 0.0000 <sup>a</sup> |
| $T$ (K)                          | $\eta$ (mPa · s) |          |          |          |          |                     |          |         |         |        |                     |
| 293.15                           | 818.0800         | 619.7300 | 477.9000 | 374.5300 | 259.2500 | 174.9200            | 117.7600 | 59.5160 | 26.2630 | 7.3116 | 1.0016              |
| 298.15                           | 559.2500         | 433.3100 | 336.9300 | 266.3600 | 187.3600 | 127.9600            | 87.9580  | 45.7620 | 20.9190 | 6.1852 | 0.8901              |
| 303.15                           | 393.2500         | 308.5400 | 242.5100 | 193.6400 | 138.2300 | 95.8170             | 66.8750  | 35.6970 | 16.8500 | 5.2503 | 0.7974              |
| 308.15                           | 283.9300         | 225.2600 | 178.9200 | 144.2000 | 104.3700 | 73.3550             | 51.9060  | 28.3600 | 13.7850 | 4.4975 | 0.7193              |
| 313.15                           | 209.9500         | 168.2900 | 134.9500 | 107.7400 | 80.4510  | 57.2430             | 41.0420  | 22.9030 | 11.4400 | 3.8970 | 0.6530              |
| 318.15                           | 158.6600         | 128.4100 | 103.9200 | 85.1670  | 63.1620  | 45.4950             | 32.9940  | 18.7810 | 9.6163  | 3.4053 | 0.5961              |
| 323.15                           | 122.2900         | 99.8350  | 81.4810  | 67.2730  | 50.4320  | 36.7440             | 26.9310  | 15.6140 | 8.1746  | 3.0007 | 0.5468              |
| 328.15                           | 95.9390          | 78.9400  | 64.9550  | 54.0010  | 40.8900  | 30.1130             | 22.2870  | 13.1430 | 7.0285  | 2.6661 | 0.5040              |
| 333.15                           | 76.4910          | 63.3940  | 52.5440  | 43.9700  | 33.6090  | 24.9170             | 18.6740  | 11.1840 | 6.1012  | 2.3844 | 0.4664              |
| 338.15                           | 61.8990          | 51.6330  | 43.1030  | 36.2770  | 27.9730  | 20.9340             | 15.8240  | 9.6214  | 5.3234  | 2.1458 | 0.4333              |
| 343.15                           | 50.7610          | 42.6010  | 35.7970  | 30.2970  | 23.5470  | 17.7800             | 13.5510  | 8.3533  | 4.6922  | 1.9406 | 0.4039              |
| 348.15                           | 42.1330          | 35.5470  | 30.0520  | 25.5850  | 20.0450  | 15.2520             | 11.7140  | 7.3047  | 4.1707  | 1.7668 | 0.3777              |
| 353.15                           | 35.3780          | 30.0020  | 25.5170  | 21.8200  | 17.2230  | 13.2010             | 10.2040  | 6.4377  | 3.7294  | 1.6138 | 0.3544              |
| LC(2:1) (1) + water (2)          |                  |          |          |          |          |                     |          |         |         |        |                     |
| $X_1$                            | 1.0000           | 0.8796   | 0.7983   | 0.6990   | 0.6012   | 0.4934              | 0.3977   | 0.2944  | 0.2005  | 0.1003 | 0.0000 <sup>a</sup> |
| $T$ (K)                          | $\eta$ (mPa · s) |          |          |          |          |                     |          |         |         |        |                     |
| 293.15                           | 645.9900         | 305.940  | 202.1200 | 152.240  | 77.8870  | 48.7670             | 24.7860  | 11.831  | 5.8246  | 2.5607 | 1.0016              |
| 298.15                           | 440.0400         | 215.860  | 145.2000 | 110.850  | 59.0150  | 37.8120             | 19.9890  | 9.8378  | 5.0175  | 2.2581 | 0.8901              |
| 303.15                           | 305.8800         | 154.930  | 106.2000 | 82.2770  | 45.4880  | 29.8250             | 16.1690  | 8.2700  | 4.3027  | 1.9815 | 0.7974              |
| 308.15                           | 218.3700         | 113.620  | 79.5900  | 62.4410  | 35.4260  | 23.6760             | 13.2150  | 6.9946  | 3.7362  | 1.7571 | 0.7193              |
| 313.15                           | 159.7400         | 85.4730  | 60.9120  | 48.3520  | 28.0870  | 19.1950             | 11.0070  | 5.9878  | 3.2737  | 1.5742 | 0.6530              |
| 318.15                           | 119.5000         | 65.6320  | 47.4990  | 38.1310  | 22.6600  | 15.7860             | 9.3009   | 5.1743  | 2.8890  | 1.4175 | 0.5961              |
| 323.15                           | 91.18000         | 51.3290  | 37.6800  | 30.5720  | 18.5630  | 13.1550             | 7.9230   | 4.5135  | 2.5718  | 1.2849 | 0.5468              |
| 328.15                           | 70.8930          | 40.8320  | 30.3780  | 24.8840  | 15.4200  | 11.0950             | 6.8141   | 3.9680  | 2.3051  | 1.1715 | 0.5040              |
| 333.15                           | 56.0390          | 32.9830  | 24.8620  | 20.5310  | 12.9710  | 9.4593              | 5.9240   | 3.5184  | 2.0796  | 1.0739 | 0.4664              |
| 338.15                           | 45.0000          | 27.0180  | 20.5870  | 17.1470  | 11.0240  | 8.1618              | 5.1880   | 3.1412  | 1.8990  | 0.9926 | 0.4333              |
| 343.15                           | 36.6520          | 22.4220  | 17.2460  | 14.4970  | 9.4730   | 7.1639              | 4.5794   | 2.8197  | 1.7131  | 0.9352 | 0.4039              |
| 348.15                           | 30.2470          | 18.8280  | 14.6190  | 12.3860  | 8.2507   | 6.2250              | 4.0372   | 2.5474  | 1.5835  | 0.8816 | 0.3777              |
| 353.15                           | 25.2610          | 15.9870  | 12.5190  | 10.6730  | 7.2069   | 5.3840              | 3.5706   | 2.2789  | 1.4540  | 0.8328 | 0.3544              |
| Choline Chloride (1) + water (2) |                  |          |          |          |          |                     |          |         |         |        |                     |
| $X_1$                            | 0.3033           | 0.2500   | 0.2015   | 0.1500   | 0.0991   | 0.0000 <sup>a</sup> |          |         |         |        |                     |
| $T$ (K)                          | $\eta$ (mPa · s) |          |          |          |          |                     |          |         |         |        |                     |
| 293.15                           | 29.2050          | 16.3180  | 10.1970  | 5.5745   | 3.1201   | 1.0016              |          |         |         |        |                     |
| 298.15                           | 24.2590          | 13.8180  | 8.7678   | 4.8722   | 2.7668   | 0.8901              |          |         |         |        |                     |
| 303.15                           | 20.3860          | 11.8240  | 7.6071   | 4.2916   | 2.4712   | 0.7974              |          |         |         |        |                     |
| 308.15                           | 17.3030          | 10.2070  | 6.6510   | 3.8058   | 2.2214   | 0.7193              |          |         |         |        |                     |
| 313.15                           | 14.8250          | 8.8821   | 5.8573   | 3.3959   | 2.0067   | 0.6530              |          |         |         |        |                     |
| 318.15                           | 12.8120          | 7.7875   | 5.1931   | 3.0476   | 1.8244   | 0.5961              |          |         |         |        |                     |
| 323.15                           | 11.1630          | 6.8756   | 4.6331   | 2.7498   | 1.6684   | 0.5468              |          |         |         |        |                     |
| 328.15                           | 9.7918           | 6.1115   | 4.1570   | 2.4930   | 1.5341   | 0.5040              |          |         |         |        |                     |
| 333.15                           | 8.6453           | 5.4624   | 3.7493   | 2.2697   | 1.4189   | 0.4664              |          |         |         |        |                     |
| 338.15                           | 7.6803           | 4.9093   | 3.3970   | 2.0751   | 1.3133   | 0.4333              |          |         |         |        |                     |
| 343.15                           | 6.8641           | 4.4396   | 3.0943   | 1.9047   | 1.2234   | 0.4039              |          |         |         |        |                     |
| 348.15                           | 6.1739           | 4.0308   | 2.8304   | 1.7596   | 1.1456   | 0.3777              |          |         |         |        |                     |
| 353.15                           | 5.5925           | 3.6820   | 2.6054   | 1.6257   | 1.0759   | 0.3544              |          |         |         |        |                     |

<sup>a</sup>Data from NIST

**Table SI. 6** Fitting parameters of the VFT equation for the fitting of viscosity ( $\eta$ ) (mPa·s) (equation 6) in function of the temperature (K) at different concentrations ( $X$ ) including standard deviation ( $\sigma$ ) for the binary systems (i) choline lactate + water and (ii) LC(2:1) + water.

| Choline lactate (1) + water (2) |             |         |           |          | LC(2:1) (1) + water (2) |             |         |           |          |
|---------------------------------|-------------|---------|-----------|----------|-------------------------|-------------|---------|-----------|----------|
| $X_i$                           | $A$ (mPa·s) | $B$ (K) | $T_0$ (K) | $\sigma$ | $X_i$                   | $A$ (mPa·s) | $B$ (K) | $T_0$ (K) | $\sigma$ |
| 1                               | 0.0802      | 1069.0  | -177.3    | 0.4788   | 1                       | 0.0284      | 1276.0  | -168.0    | 0.5944   |
| 0.9                             | 0.0593      | 1132.0  | -170.8    | 0.6287   | 0.9                     | 0.0348      | 1147.0  | -169.0    | 0.6655   |
| 0.8                             | 0.0725      | 1049.0  | -173.8    | 0.4648   | 0.8                     | 0.0407      | 1070.0  | -169.7    | 0.4527   |
| 0.7                             | 0.0849      | 977.9   | -176.6    | 0.3820   | 0.7                     | 0.0345      | 1186.0  | -151.3    | 0.5741   |
| 0.6                             | 0.0808      | 953.5   | -175.0    | 0.4510   | 0.6                     | 0.0382      | 1021.0  | -161.9    | 0.2180   |
| 0.5                             | 0.0885      | 879.8   | -177.2    | 0.1278   | 0.5                     | 0.0451      | 938.9   | -161.6    | 0.1026   |
| 0.4                             | 0.0795      | 866.0   | -174.5    | 0.1629   | 0.4                     | 0.0401      | 920.2   | -153.1    | 0.0560   |
| 0.3                             | 0.0717      | 812.8   | -172.3    | 0.0879   | 0.3                     | 0.0392      | 868.1   | -144.4    | 0.0166   |
| 0.2                             | 0.0613      | 763.1   | -167.3    | 0.0320   | 0.2                     | 0.0434      | 751.2   | -143.2    | 0.0136   |
| 0.1                             | 0.0488      | 722.1   | -151.4    | 0.3427   | 0.1                     | 0.0611      | 509.7   | -159.2    | 0.0140   |
| 0                               | 0.0260      | 551.3   | -142.1    | 0.0006   | 0                       | 0.0260      | 551.3   | -142.1    | 0.0006   |

**Table SI.7** Experimental values of viscosity deviation ( $\Delta\eta$ ) of the binary mixtures composed of (i) choline lactate + water and (ii) LC (2:1) + water as a function of temperature ( $T$ ) and composition ( $X_1$ ).

| Choline Lactate (1) + water (2) |                      |           |           |           |           |           |           |           |           |          |        |
|---------------------------------|----------------------|-----------|-----------|-----------|-----------|-----------|-----------|-----------|-----------|----------|--------|
| $X_1$                           | 1.0000               | 0.9008    | 0.7952    | 0.6992    | 0.5962    | 0.4974    | 0.4142    | 0.2990    | 0.2007    | 0.1002   | 0.0000 |
| $T$ (K)                         | $\Delta\eta$ (mPa·s) |           |           |           |           |           |           |           |           |          |        |
| 293.15                          | 0.0000               | -117.2958 | -172.8423 | -197.7728 | -228.8937 | -232.4964 | -221.6755 | -185.7920 | -138.7262 | -75.5613 | 0.0000 |
| 298.15                          | 0.0000               | -70.5507  | -107.9679 | -124.9353 | -146.4243 | -150.6583 | -144.2048 | -122.0777 | -92.0339  | -50.6525 | 0.0000 |
| 303.15                          | 0.0000               | -45.7787  | -70.3657  | -81.5602  | -96.5476  | -100.1863 | -96.4762  | -82.4437  | -62.7126  | -34.8708 | 0.0000 |
| 308.15                          | 0.0000               | -30.5755  | -47.0085  | -54.5402  | -65.1995  | -68.2333  | -66.1192  | -57.0393  | -43.7747  | -24.5995 | 0.0000 |
| 313.15                          | 0.0000               | -20.8977  | -32.1360  | -39.2535  | -44.9849  | -47.5143  | -46.3018  | -40.3298  | -31.2189  | -17.7275 | 0.0000 |
| 318.15                          | 0.0000               | -14.5701  | -22.3685  | -25.9474  | -31.6718  | -33.7221  | -33.0721  | -29.0762  | -22.7032  | -13.0288 | 0.0000 |
| 323.15                          | 0.0000               | -10.3781  | -15.8760  | -18.3966  | -22.6981  | -24.3579  | -24.0418  | -21.3340  | -16.8061  | -9.7448  | 0.0000 |
| 328.15                          | 0.0000               | -7.5318   | -11.4389  | -13.2311  | -16.5123  | -17.8604  | -17.7462  | -15.8961  | -12.6293  | -7.4005  | 0.0000 |
| 333.15                          | 0.0000               | -5.5554   | -8.3772   | -9.6528   | -12.1833  | -13.3640  | -13.2818  | -12.0138  | -9.6233   | -5.6997  | 0.0000 |
| 338.15                          | 0.0000               | -4.1686   | -6.2078   | -7.1331   | -9.1061   | -10.0723  | -10.0684  | -9.1901   | -7.4460   | -4.4463  | 0.0000 |
| 343.15                          | 0.0000               | -3.1646   | -4.6509   | -5.3166   | -6.8798   | -7.6715   | -7.7108   | -7.1074   | -5.8184   | -3.5091  | 0.0000 |
| 348.15                          | 0.0000               | -2.4439   | -3.5295   | -3.9880   | -5.2272   | -5.8948   | -5.9588   | -5.5579   | -4.5873   | -2.7948  | 0.0000 |
| 353.15                          | 0.0000               | -1.9017   | -2.6882   | -3.0229   | -4.0125   | -4.5741   | -4.6571   | -4.3887   | -3.6542   | -2.2499  | 0.0000 |
| LC(2:1) (1) + water (2)         |                      |           |           |           |           |           |           |           |           |          |        |
| $X_1$                           | 1.0000               | 0.8796    | 0.7983    | 0.6990    | 0.6012    | 0.4934    | 0.3977    | 0.2944    | 0.2005    | 0.1003   | 0.0000 |
| $T$ (K)                         | $\Delta\eta$ (mPa·s) |           |           |           |           |           |           |           |           |          |        |
| 293.15                          | 0.0000               | -311.6218 | -372.6509 | -385.8990 | -368.9428 | -320.9790 | -276.0383 | -212.2328 | -147.5610 | -74.8407 | 0.0000 |
| 298.15                          | 0.0000               | -202.9432 | -244.3194 | -253.4123 | -243.7244 | -212.7972 | -184.0466 | -142.2808 | -99.2240  | -50.4484 | 0.0000 |
| 303.15                          | 0.0000               | -134.9539 | -163.2081 | -165.7426 | -163.8221 | -143.5021 | -125.0742 | -97.1314  | -68.0169  | -34.6887 | 0.0000 |
| 308.15                          | 0.0000               | -92.5719  | -111.8264 | -112.6196 | -113.2797 | -99.5017  | -87.2315  | -68.0328  | -47.8122  | -24.4674 | 0.0000 |
| 313.15                          | 0.0000               | -64.7935  | -78.4741  | -77.7139  | -80.1818  | -70.5002  | -62.1888  | -48.7424  | -34.3860  | -17.6567 | 0.0000 |
| 318.15                          | 0.0000               | -46.3828  | -56.3267  | -55.5052  | -57.9666  | -51.0204  | -45.2505  | -35.6631  | -25.2571  | -13.0158 | 0.0000 |
| 323.15                          | 0.0000               | -33.8676  | -41.2292  | -40.0466  | -42.6944  | -37.6118  | -33.5600  | -26.5763  | -18.8939  | -9.7740  | 0.0000 |
| 328.15                          | 0.0000               | -25.2059  | -30.7396  | -29.0227  | -32.0085  | -28.2202  | -25.3344  | -20.1539  | -14.3812  | -7.4688  | 0.0000 |
| 333.15                          | 0.0000               | -19.0679  | -23.2745  | -21.9162  | -24.3715  | -21.5033  | -19.4107  | -15.5144  | -11.1129  | -5.7947  | 0.0000 |
| 338.15                          | 0.0000               | -14.6676  | -17.9401  | -16.8160  | -18.8520  | -16.6128  | -15.0986  | -12.1186  | -8.6996   | -4.5581  | 0.0000 |
| 343.15                          | 0.0000               | -11.4451  | -14.5766  | -13.0706  | -14.7745  | -12.9396  | -11.9011  | -9.5925   | -6.9282   | -3.6168  | 0.0000 |
| 348.15                          | 0.0000               | -9.0561   | -11.1223  | -10.2927  | -11.6897  | -10.3222  | -9.5361   | -7.6855   | -5.5559   | -2.9031  | 0.0000 |
| 353.15                          | 0.0000               | -7.2484   | -8.9203   | -8.2121   | -9.3963   | -8.4111   | -7.7462   | -6.2638   | -4.5182   | -2.3537  | 0.0000 |

**Table SI.8** Coefficients of the Redlich-Kister equation for the fitting of the viscosity deviation ( $\Delta\eta$ ) of the binary mixtures composed of (i) choline lactate + water and (ii) LC (2:1) + water.

| Choline Lactate (1) + water (2) |         |        |         |         |         |         |         |         |          |
|---------------------------------|---------|--------|---------|---------|---------|---------|---------|---------|----------|
| $T(K)$                          | $b_1$   | $b_2$  | $b_3$   | $b_4$   | $c_1$   | $c_2$   | $c_3$   | $c_4$   | $\sigma$ |
| 293.15                          | -6.0181 | 5.6599 | -5.6461 | -2.1060 | -3.1014 | -0.0921 | -0.5544 | -1.4150 | 1.9957   |
| 298.15                          | -6.0141 | 5.6603 | -5.6451 | -2.1037 | -1.9671 | 0.0078  | -0.2676 | -0.7678 | 1.7040   |
| 303.15                          | -6.0117 | 5.6604 | -5.6448 | -2.1028 | -1.2787 | 0.0521  | -0.1719 | -0.5019 | 1.3294   |
| 308.15                          | -6.0103 | 5.6605 | -5.6446 | -2.1022 | -0.8495 | 0.0659  | -0.1160 | -0.3413 | 1.2320   |
| 313.15                          | -6.0094 | 5.6604 | -5.6445 | -2.1017 | -0.5788 | 0.0365  | -0.0829 | -0.1863 | 0.5294   |
| 318.15                          | -6.0088 | 5.6604 | -5.6444 | -2.1017 | -0.3960 | 0.0580  | -0.0551 | -0.1682 | 0.6594   |
| 323.15                          | -6.0084 | 5.6604 | -5.6444 | -2.1015 | -0.2761 | 0.0490  | -0.0388 | -0.1216 | 0.4980   |
| 328.15                          | -6.0081 | 5.6604 | -5.6443 | -2.1014 | -0.1942 | 0.0403  | -0.0274 | -0.0900 | 0.3850   |
| 333.15                          | -6.0079 | 5.6603 | -5.6443 | -2.1013 | -0.1377 | 0.0321  | -0.0183 | -0.0674 | 0.3115   |
| 338.15                          | -6.0078 | 5.6603 | -5.6443 | -2.1013 | -0.0977 | 0.0250  | -0.0125 | -0.0510 | 0.2485   |
| 343.15                          | -6.0077 | 5.6603 | -5.6443 | -2.1012 | -0.0689 | 0.0188  | -0.0080 | -0.0387 | 0.2024   |
| 348.15                          | -6.0077 | 5.6603 | -5.6442 | -2.1012 | -0.0480 | 0.0140  | -0.0048 | -0.0309 | 0.1664   |
| 353.15                          | -6.0076 | 5.6603 | -5.6442 | -2.1012 | -0.0328 | 0.0099  | -0.0019 | -0.0242 | 0.1368   |
| LC(2:1) (1) + water (2)         |         |        |         |         |         |         |         |         |          |
| $T(K)$                          | $b_1$   | $b_2$  | $b_3$   | $b_4$   | $c_1$   | $c_2$   | $c_3$   | $c_4$   | $\sigma$ |
| 293.15                          | -6.0225 | 5.6498 | -5.6555 | -2.1107 | -4.3915 | -3.0488 | -3.3034 | -2.7955 | 2.2925   |
| 298.15                          | -6.0171 | 5.6538 | -5.6512 | -2.1071 | -2.8587 | -1.9274 | -2.0836 | -1.7784 | 1.7330   |
| 303.15                          | -6.0137 | 5.6563 | -5.6487 | -2.1053 | -1.8846 | -1.1815 | -1.3469 | -1.2750 | 1.2491   |
| 308.15                          | -6.0117 | 5.6578 | -5.6471 | -2.1041 | -1.2778 | -0.7608 | -0.8943 | -0.9036 | 0.9526   |
| 313.15                          | -6.0103 | 5.6587 | -5.6462 | -2.1032 | -0.8840 | -0.4961 | -0.6054 | -0.6599 | 1.1832   |
| 318.15                          | -6.0095 | 5.6592 | -5.6456 | -2.1026 | -0.6247 | -0.3411 | -0.4199 | -0.4724 | 0.9125   |
| 323.15                          | -6.0089 | 5.6595 | -5.6452 | -2.1022 | -0.4481 | -0.2349 | -0.2966 | -0.3551 | 1.1326   |
| 328.15                          | -6.0085 | 5.6597 | -5.6449 | -2.1020 | -0.3255 | -0.1599 | -0.2129 | -0.2821 | 1.0694   |
| 333.15                          | -6.0082 | 5.6599 | -5.6447 | -2.1018 | -0.2402 | -0.1185 | -0.1549 | -0.2117 | 0.8396   |
| 338.15                          | -6.0081 | 5.6600 | -5.6446 | -2.1016 | -0.1792 | -0.0903 | -0.1143 | -0.1615 | 0.6716   |
| 343.15                          | -6.0079 | 5.6600 | -5.6445 | -2.1015 | -0.1343 | -0.0722 | -0.0920 | -0.1285 | 0.5948   |
| 348.15                          | -6.0078 | 5.6601 | -5.6444 | -2.1014 | -0.1019 | -0.0550 | -0.0637 | -0.1014 | 0.4410   |
| 353.15                          | -6.0077 | 5.6601 | -5.6444 | -2.1014 | -0.0781 | -0.0441 | -0.0457 | -0.0824 | 0.3638   |



**Table SI.9** Density ( $\rho$ ) experimental values for binary mixture of choline lactate + ethanol as a function of temperature ( $T$ ) and composition ( $X$ ).

| $X_i$   | 1.0000                      | 0.8961 | 0.7989 | 0.7004 | 0.6001 | 0.4997 | 0.3990 | 0.2987 | 0.2013 | 0.1004 | 0.0000 <sup>a</sup> |
|---------|-----------------------------|--------|--------|--------|--------|--------|--------|--------|--------|--------|---------------------|
| $T$ (K) | $\rho$ (g/cm <sup>3</sup> ) |        |        |        |        |        |        |        |        |        |                     |
| 293.15  | 1.1456                      | 1.1356 | 1.1210 | 1.1049 | 1.0862 | 1.0627 | 1.0344 | 0.9979 | 0.9511 | 0.8857 | 0.7894              |
| 298.15  | 1.1423                      | 1.1322 | 1.1177 | 1.1016 | 1.0828 | 1.0594 | 1.0309 | 0.9943 | 0.9476 | 0.8817 | 0.7852              |
| 303.15  | 1.1390                      | 1.1289 | 1.1145 | 1.0984 | 1.0796 | 1.0560 | 1.0275 | 0.9907 | 0.9439 | 0.8778 | 0.7810              |
| 308.15  | 1.1358                      | 1.1258 | 1.1113 | 1.0952 | 1.0763 | 1.0527 | 1.0241 | 0.9872 | 0.9402 | 0.8740 | 0.7767              |
| 313.15  | 1.1327                      | 1.1226 | 1.1082 | 1.0920 | 1.0731 | 1.0494 | 1.0207 | 0.9836 | 0.9365 | 0.8699 | 0.7725              |
| 318.15  | 1.1296                      | 1.1196 | 1.1051 | 1.0888 | 1.0699 | 1.0461 | 1.0173 | 0.9800 | 0.9328 | 0.8658 | 0.7683              |
| 323.15  | 1.1265                      | 1.1165 | 1.1020 | 1.0857 | 1.0667 | 1.0429 | 1.0140 | 0.9765 | 0.9291 | 0.8618 | 0.7640              |
| 328.15  | 1.1235                      | 1.1135 | 1.0989 | 1.0825 | 1.0635 | 1.0396 | 1.0105 | 0.9730 | 0.9254 | 0.8579 | 0.7598              |
| 333.15  | 1.1205                      | 1.1104 | 1.0958 | 1.0794 | 1.0603 | 1.0364 | 1.0072 | 0.9695 | 0.9217 | 0.8539 | 0.7556              |
| 338.15  | 1.1175                      | 1.1074 | 1.0927 | 1.0763 | 1.0571 | 1.0330 | 1.0039 | 0.9660 | 0.9180 | 0.8499 | 0.7513              |
| 343.15  | 1.1145                      | 1.1044 | 1.0897 | 1.0732 | 1.0540 | 1.0298 | 1.0006 | 0.9625 | 0.9144 | 0.8458 | 0.7471              |

<sup>a</sup>Data from NIST

**Table SI. 10** Fit parameters of the first-order polynomial ( $\rho = a + bT$ ) for the fitting of the density ( $\text{g/cm}^3$ ) in function of the temperature (K) at different concentrations ( $X$ ) including standard deviation ( $\sigma$ ) for the binary system choline lactate + ethanol.

| $X_l$ | $a$ ( $\text{g/cm}^3$ ) | $b$ ( $\text{K}^{-1}$ ) | $\sigma$ |
|-------|-------------------------|-------------------------|----------|
| 1     | 1.3241                  | -0.0006                 | 0.0038   |
| 0.9   | 1.3172                  | -0.0006                 | 0.0073   |
| 0.8   | 1.3039                  | -0.0006                 | 0.0087   |
| 0.7   | 1.2904                  | -0.0006                 | 0.0117   |
| 0.6   | 1.2746                  | -0.0006                 | 0.0152   |
| 0.5   | 1.2554                  | -0.0007                 | 0.0149   |
| 0.4   | 1.2324                  | -0.0007                 | 0.0085   |
| 0.3   | 1.2053                  | -0.0007                 | 0.0028   |
| 0.2   | 1.1674                  | -0.0007                 | 0.0132   |
| 0.1   | 1.1196                  | -0.0008                 | 0.0008   |
| 0     | 1.0375                  | -0.0008                 | 0.0163   |

**Table SI.11** Experimental values of excess molar volume ( $V_m^E$ ) of the binary mixtures composed of choline lactate + ethanol as a function of temperature ( $T$ ) and composition ( $X$ ).

| Choline Lactate (1) + ethanol (2) |                                                 |         |         |         |         |         |         |         |         |         |        |
|-----------------------------------|-------------------------------------------------|---------|---------|---------|---------|---------|---------|---------|---------|---------|--------|
| $X_1$                             | 1.0000                                          | 0.8961  | 0.7989  | 0.7004  | 0.6001  | 0.4997  | 0.3990  | 0.2987  | 0.2013  | 0.1004  | 0.0000 |
| $T$ (K)                           | $V_m^E$ ( $\text{cm}^3 \cdot \text{mol}^{-1}$ ) |         |         |         |         |         |         |         |         |         |        |
| 293.15                            | 0.0000                                          | -0.5191 | -0.5179 | -0.6459 | -0.8480 | -0.9413 | -1.0807 | -1.1026 | -0.9888 | -0.7441 | 0.0000 |
| 298.15                            | 0.0000                                          | -0.5179 | -0.5395 | -0.6771 | -0.8778 | -0.9916 | -1.1203 | -1.1421 | -1.0441 | -0.7643 | 0.0000 |
| 303.15                            | 0.0000                                          | -0.5307 | -0.5746 | -0.7212 | -0.9312 | -1.0321 | -1.1706 | -1.1825 | -1.0836 | -0.7929 | 0.0000 |
| 308.15                            | 0.0000                                          | -0.5583 | -0.5983 | -0.7555 | -0.9649 | -1.0767 | -1.2159 | -1.2285 | -1.1210 | -0.8287 | 0.0000 |
| 313.15                            | 0.0000                                          | -0.5588 | -0.6237 | -0.7800 | -1.0020 | -1.1147 | -1.2561 | -1.2617 | -1.1562 | -0.8396 | 0.0000 |
| 318.15                            | 0.0000                                          | -0.5877 | -0.6496 | -0.8049 | -1.0398 | -1.1534 | -1.2973 | -1.2958 | -1.1922 | -0.8509 | 0.0000 |
| 323.15                            | 0.0000                                          | -0.6028 | -0.6759 | -0.8430 | -1.0783 | -1.2040 | -1.3495 | -1.3401 | -1.2292 | -0.8708 | 0.0000 |
| 328.15                            | 0.0000                                          | -0.6187 | -0.6905 | -0.8584 | -1.1085 | -1.2369 | -1.3763 | -1.3809 | -1.2639 | -0.8980 | 0.0000 |
| 333.15                            | 0.0000                                          | -0.6205 | -0.7055 | -0.8870 | -1.1393 | -1.2817 | -1.4244 | -1.4226 | -1.2995 | -0.9175 | 0.0000 |
| 338.15                            | 0.0000                                          | -0.6369 | -0.7207 | -0.9162 | -1.1708 | -1.3051 | -1.4735 | -1.4653 | -1.3360 | -0.9376 | 0.0000 |
| 343.15                            | 0.0000                                          | -0.6536 | -0.7502 | -0.9460 | -1.2152 | -1.3517 | -1.5238 | -1.5091 | -1.3825 | -0.9497 | 0.0000 |

**Table SI.12** Coefficients of the Redlich-Kister equation for the fitting of the excess molar volume ( $V_m^E$ ) of the binary mixtures composed of choline lactate + ethanol.

| Choline Lactate (1) + ethanol (2) |           |          |           |          |          |           |          |          |          |
|-----------------------------------|-----------|----------|-----------|----------|----------|-----------|----------|----------|----------|
| $T$ (K)                           | $b_1$     | $b_2$    | $b_3$     | $b_4$    | $c_1$    | $c_2$     | $c_3$    | $c_4$    | $\sigma$ |
| 293.15                            | -5.257000 | 8.022206 | -3.860000 | 1.072204 | 0.004865 | -0.019210 | 0.004575 | 0.000000 | 0.0246   |
| 298.15                            | -5.257000 | 2.495392 | -3.860000 | 1.053800 | 0.004235 | 0.000023  | 0.004157 | 0.000000 | 0.0191   |
| 303.15                            | -5.257000 | 2.445163 | -3.860000 | 1.053930 | 0.003538 | 0.000023  | 0.003725 | 0.000655 | 0.0208   |
| 308.15                            | -5.257000 | 2.495727 | -3.860000 | 1.191455 | 0.002937 | 0.000023  | 0.003321 | 0.000672 | 0.0215   |
| 313.15                            | -5.257000 | 2.577726 | -3.860000 | 1.036092 | 0.002404 | 0.000023  | 0.003161 | 0.000656 | 0.0215   |
| 318.15                            | -5.257000 | 2.662075 | -5.64429  | 0.880190 | 0.001904 | -0.000158 | 0.008346 | 0.000680 | 0.0222   |
| 323.15                            | -6.007505 | 2.745749 | -3.860000 | 0.786569 | 0.003572 | 0.000023  | 0.002933 | 0.000624 | 0.0214   |
| 328.15                            | -6.007505 | 2.822753 | -3.860000 | 0.905712 | 0.003149 | 0.000023  | 0.002631 | 0.000639 | 0.0219   |
| 333.15                            | -6.007505 | 2.943220 | -3.860000 | 0.850416 | 0.002588 | 0.000023  | 0.002709 | 0.000631 | 0.0209   |
| 338.15                            | -6.007505 | 2.957110 | -3.860000 | 0.844147 | 0.002125 | 0.000390  | 0.002429 | 0.000247 | 0.0212   |
| 343.15                            | -6.007505 | 3.104115 | -5.64428  | 0.422423 | 0.001546 | 0.000351  | 0.007458 | 0.000737 | 0.0218   |

**Table SI.13** Experimental dynamic viscosity ( $\eta$ ) for binary mixtures of choline lactate + ethanol as a function of temperature ( $T$ ) and composition ( $X$ ).

| $X_l$   | 1.0000           | 0.8961   | 0.7989   | 0.7004   | 0.6001   | 0.4997  | 0.3990  | 0.2987  | 0.2013 | 0.1004 | 0.0000 <sup>a</sup> |
|---------|------------------|----------|----------|----------|----------|---------|---------|---------|--------|--------|---------------------|
| $T$ (K) | $\eta$ (mPa · s) |          |          |          |          |         |         |         |        |        |                     |
| 293.15  | 818.0800         | 552.7000 | 365.2600 | 225.4000 | 132.4800 | 73.4770 | 39.3540 | 17.7550 | 8.5793 | 3.6025 | 1.1441              |
| 298.15  | 559.2500         | 387.5100 | 263.7500 | 165.1000 | 101.5000 | 57.1070 | 31.9360 | 14.7280 | 7.3570 | 3.2074 | 1.0405              |
| 303.15  | 393.2500         | 277.4200 | 193.1900 | 123.8900 | 78.0580  | 45.1890 | 25.9570 | 12.3650 | 6.3508 | 2.8529 | 0.9486              |
| 308.15  | 283.9300         | 203.6900 | 144.7900 | 94.9030  | 61.0120  | 36.3450 | 21.3790 | 10.4920 | 5.5245 | 2.5483 | 0.8669              |
| 313.15  | 209.9500         | 152.9400 | 110.7900 | 74.0850  | 48.5680  | 29.6510 | 17.8310 | 8.9896  | 4.8409 | 2.2863 | 0.7940              |
| 318.15  | 158.6600         | 117.2000 | 86.3390  | 58.8240  | 39.2690  | 24.5120 | 15.0490 | 7.7729  | 4.2702 | 2.0590 | 0.7287              |
| 323.15  | 122.2900         | 91.5680  | 68.4330  | 47.4510  | 32.2210  | 20.5090 | 12.8350 | 6.7786  | 3.7921 | 1.8616 | 0.6700              |
| 328.15  | 95.9390          | 72.6670  | 55.0730  | 38.7980  | 26.7630  | 17.3350 | 11.1010 | 5.9517  | 3.3869 | 1.6849 | 0.6172              |
| 333.15  | 76.4910          | 58.6000  | 44.9477  | 32.1270  | 22.4910  | 14.8030 | 9.6667  | 5.2547  | 3.0408 | 1.5248 | 0.5696              |
| 338.15  | 61.8990          | 47.9010  | 37.1480  | 26.9050  | 19.0770  | 12.7580 | 8.4454  | 4.6604  | 2.7474 | 1.3803 | 0.5265              |
| 343.15  | 50.7610          | 39.7320  | 31.0570  | 22.7640  | 16.3550  | 11.0890 | 7.4590  | 4.1450  | 2.4985 | 1.2650 | 0.4873              |

<sup>a</sup>Data from NIST

**Table SI. 14** Fitting parameters of the VFT equation for the fitting of viscosity ( $\eta$ ) (mPa·s) (equation 6) in function of the temperature ( $T$ ) at different concentrations ( $X$ ) including standard deviation ( $\sigma$ ) for the binary system choline lactate + ethanol.

| $X_l$ | $A$ (mPa·s) | $B$ (K) | $T_0$ (K) | $\sigma$ |
|-------|-------------|---------|-----------|----------|
| 1     | 0.0802      | 1069.0  | -177.3    | 0.4788   |
| 0.9   | 0.06424     | 1106.0  | -171.4    | 4.5132   |
| 0.8   | 0.05025     | 1150.0  | -163.8    | 0.2722   |
| 0.7   | 0.08897     | 947.5   | -172.3    | 0.3083   |
| 0.6   | 0.04064     | 1148.0  | -151.3    | 0.3223   |
| 0.5   | 0.07998     | 889.5   | -162.8    | 0.0358   |
| 0.4   | 0.05589     | 957.7   | -147.2    | 0.0981   |
| 0.3   | 0.04948     | 900.2   | -140.1    | 0.0133   |
| 0.2   | 0.03575     | 939.8   | -121.7    | 0.0050   |
| 0.1   | 0.00646     | 1607.0  | -39.2     | 0.0102   |
| 0     | 0.00461     | 1521.0  | -17.4     | 0.0033   |

**Table SI.15** Experimental values of viscosity deviation ( $\Delta\eta$ ) of the binary mixtures composed of choline lactate + ethanol as a function of temperature ( $T$ ) and composition ( $X$ ).

| Choline Lactate (1) + ethanol(2) |                      |           |           |           |           |           |           |           |           |          |        |
|----------------------------------|----------------------|-----------|-----------|-----------|-----------|-----------|-----------|-----------|-----------|----------|--------|
| $X_1$                            | 1.0000               | 0.8961    | 0.7989    | 0.7004    | 0.6001    | 0.4997    | 0.3990    | 0.2987    | 0.2013    | 0.1004   | 0.0000 |
| $T$ (K)                          | $\Delta\eta$ (mPa·s) |           |           |           |           |           |           |           |           |          |        |
| 293.15                           | 0.0000               | -180.5004 | -288.5342 | -347.9260 | -358.9073 | -335.8899 | -287.7475 | -227.4078 | -157.0140 | -79.5619 | 0.0000 |
| 298.15                           | 0.0000               | -113.7420 | -183.2441 | -226.9104 | -234.5220 | -222.8708 | -191.8301 | -153.0497 | -106.0511 | -53.8773 | 0.0000 |
| 303.15                           | 0.0000               | -75.0699  | -121.1682 | -151.8265 | -158.3107 | -151.7926 | -131.5199 | -105.7640 | -73.5680  | -37.4827 | 0.0000 |
| 308.15                           | 0.0000               | -50.8297  | -82.2160  | -104.2213 | -109.7211 | -105.9685 | -92.4301  | -74.9258  | -52.3230  | -26.7381 | 0.0000 |
| 313.15                           | 0.0000               | -35.2787  | -57.0987  | -73.2018  | -77.7405  | -75.6582  | -66.4162  | -54.2793  | -38.0562  | -19.5070 | 0.0000 |
| 318.15                           | 0.0000               | -25.0509  | -40.5610  | -52.5198  | -56.2343  | -55.1349  | -48.6943  | -40.1298  | -28.2501  | -14.5259 | 0.0000 |
| 323.15                           | 0.0000               | -18.0857  | -29.3992  | -38.4017  | -41.4332  | -40.9345  | -36.3614  | -30.2193  | -21.3600  | -11.0191 | 0.0000 |
| 328.15                           | 0.0000               | -13.3681  | -21.6968  | -28.5826  | -31.0568  | -30.9145  | -27.5496  | -23.1381  | -16.4186  | -8.5026  | 0.0000 |
| 333.15                           | 0.0000               | -10.0028  | -16.2755  | -21.6179  | -23.6390  | -23.7045  | -21.1955  | -17.9926  | -12.8118  | -6.6673  | 0.0000 |
| 338.15                           | 0.0000               | -7.6214   | -12.4090  | -16.6068  | -18.2791  | -18.4363  | -16.5687  | -14.1980  | -10.1334  | -5.3079  | 0.0000 |
| 343.15                           | 0.0000               | -5.8056   | -9.5940   | -12.9350  | -14.3016  | -14.5201  | -13.0875  | -11.3591  | -8.1089   | -4.2698  | 0.0000 |

**Table SI.16** Coefficients of the Redlich-Kister equation for the fitting of the viscosity deviation ( $\Delta\eta$ ) of the binary mixtures composed of choline lactate + ethanol.

| Choline Lactate (1) + ethanol (2) |         |          |          |          |         |         |         |         |          |
|-----------------------------------|---------|----------|----------|----------|---------|---------|---------|---------|----------|
| $T$ (K)                           | $b_1$   | $b_2$    | $b_3$    | $b_4$    | $c_1$   | $c_2$   | $c_3$   | $c_4$   | $\sigma$ |
| 293.15                            | -0.0007 | 158.0491 | 665.2783 | 912.1425 | -4.5936 | -3.0304 | -2.6571 | -2.7349 | 0.9611   |
| 298.15                            | -0.0004 | 127.6314 | 461.3618 | 609.1927 | -2.9920 | -1.9189 | -1.6594 | -1.7350 | 0.7195   |
| 303.15                            | -0.0004 | 80.2341  | 289.0426 | 434.8154 | -2.0027 | -1.1769 | -0.9768 | -1.2441 | 0.8119   |
| 308.15                            | -0.0003 | 57.8642  | 187.4631 | 309.4012 | -1.3752 | -0.7586 | -0.5916 | -0.8810 | 0.6221   |
| 313.15                            | -0.0003 | 41.6752  | 120.1714 | 225.6552 | -0.9658 | -0.4951 | -0.3527 | -0.6430 | 0.4951   |
| 318.15                            | -0.0002 | 34.3998  | 77.9004  | 161.5017 | -0.6924 | -0.3408 | -0.2116 | -0.4595 | 0.4218   |
| 323.15                            | -0.0002 | 27.0240  | 48.8300  | 121.6241 | -0.5059 | -0.2349 | -0.1195 | -0.3453 | 0.3297   |
| 328.15                            | -0.0002 | 19.9786  | 28.1737  | 96.2692  | -0.3758 | -0.1600 | -0.0593 | -0.2744 | 0.2785   |
| 333.15                            | -0.0001 | 17.7495  | 15.0188  | 72.7267  | -0.2835 | -0.1187 | -0.0228 | -0.2056 | 0.2323   |
| 338.15                            | -0.0001 | 16.0532  | 5.6750   | 55.6388  | -0.2172 | -0.0905 | 0.0015  | -0.1567 | 0.1930   |
| 343.15                            | -0.0001 | 14.9889  | 1.2460   | 45.3161  | -0.1686 | -0.0724 | 0.0122  | -0.1248 | 0.1613   |



**Table SI.17** Fitting parameters of Antoine equation (9) for the studied entrainers in binary mixtures with water and their correspondent deviations.

| Entrainer        | Entrainer Mole fraction | <i>A</i> | <i>B</i> (K) | <i>C</i> (K) | AADp (%) |
|------------------|-------------------------|----------|--------------|--------------|----------|
| Choline Chloride | 0.0708                  | 22.1330  | 3200.88      | -73.0148     | 0.86     |
|                  | 0.1998                  | 22.1667  | 3201.21      | -80.9387     | 1.85     |
| Choline lactate  | 0.1938                  | 22.0486  | 3201.17      | -80.1894     | 3.32     |
| LC (2:1)         | 0.1961                  | 22.2587  | 3200.99      | -76.0793     | 0.93     |

**Table SI.18** Fitting parameters of Antoine equation (9) for the studied entrainers in binary mixtures with ethanol and their correspondent deviations.

| Entrainer       | Entrainer Mole fraction | <i>A</i> | <i>B</i> (K) | <i>C</i> (K)         | AADp (%) |
|-----------------|-------------------------|----------|--------------|----------------------|----------|
| Choline Lactate | 0.2000                  | 25.740   | 4993.85      | 0                    | 0.29     |
| LC (2:1)        | 0.1999                  | 25.747   | 4993.86      | 1.3·10 <sup>-5</sup> | 0.48     |

$$AAD_p = (1/N) \sum_i^N \left| \frac{P_i^{exp} - P_i^{cal}}{P_i^{exp}} \right| \cdot 100 \% (N, \text{number of data points})$$

**Table SI.19** Binary interaction parameters and deviations found for the correlation with e-NRTL model of the VLE data of the ternary system composed by choline lactate + ethanol + water.

| i component     | j component         | $\alpha_{ij}$ | $\Delta g_{ij}$ (J·mol <sup>-1</sup> ) | $\Delta g_{ji}$ (J·mol <sup>-1</sup> ) | AARD (y) |
|-----------------|---------------------|---------------|----------------------------------------|----------------------------------------|----------|
| $X_{IL} = 0.20$ |                     |               |                                        |                                        |          |
| Water (1)       | Ethanol (2)         | 0.33          | 5744.1                                 | -311.48                                | 0.078    |
| Water (1)       | Choline lactate (3) | 0.70          | 8974.9                                 | -2009.3                                |          |
| Ethanol (2)     | Choline lactate (3) | 0.80          | 7289.2                                 | -1869.1                                |          |
| $X_{IL} = 0.15$ |                     |               |                                        |                                        |          |
| Water (1)       | Ethanol (2)         | 0.33          | 5744.1                                 | -311.48                                | 0.010    |
| Water (1)       | Choline lactate (3) | 1.36          | 8974.9                                 | -2009.3                                |          |
| Ethanol (2)     | Choline lactate (3) | 0.94          | 7289.2                                 | -1869.1                                |          |
| $X_{IL} = 0.10$ |                     |               |                                        |                                        |          |
| Water (1)       | Ethanol (2)         | 0.33          | 5744.1                                 | -311.48                                | 0.009    |
| Water (1)       | Choline lactate (3) | 1.36          | 8974.9                                 | -2009.3                                |          |
| Ethanol (2)     | Choline lactate (3) | 1.10          | 7289.2                                 | -1869.1                                |          |

$$AARD(y) = \sum_{i=1}^n |y_i^{cal}/y_i^{exp} - 1.0|/n$$
